# Supplementary material for: STAP-2 facilitates insulin signaling through binding to CAP/c-Cbl and regulates adipocyte differentiation
Source: Springer Nature journal article supplement (doi:10.1038/s41598-024-56533-0), 2024-03-09
Supplement: MOESM2 [file 41598_2024_56533_MOESM2_ESM.pdf]

# Figure 1

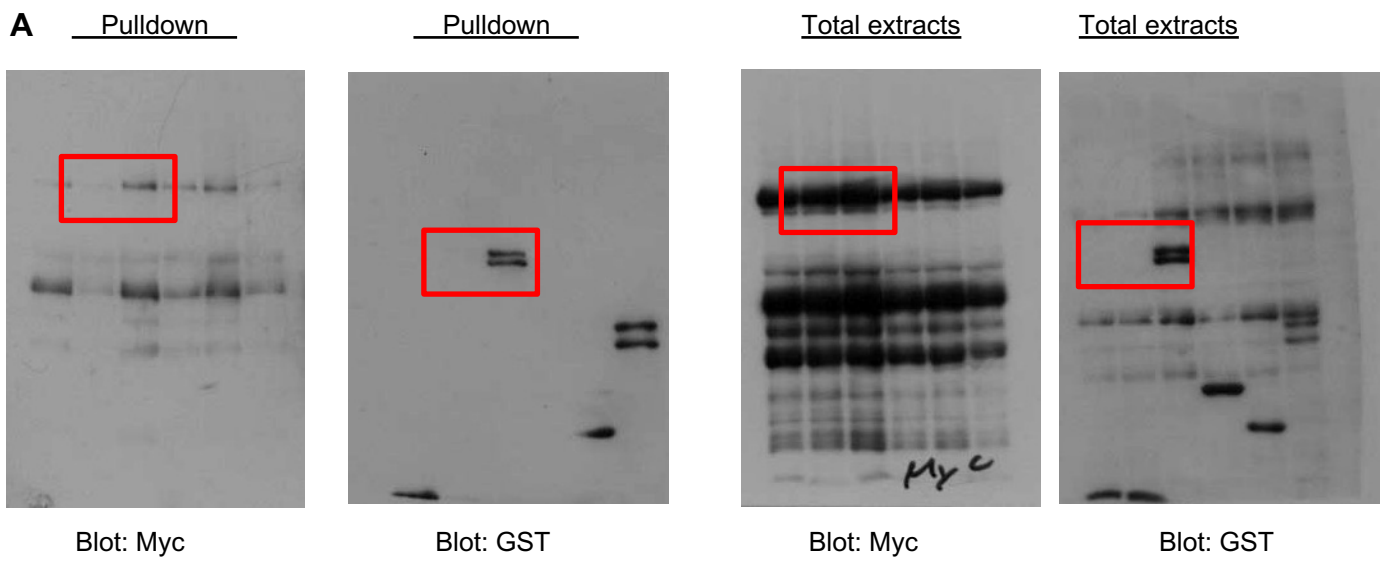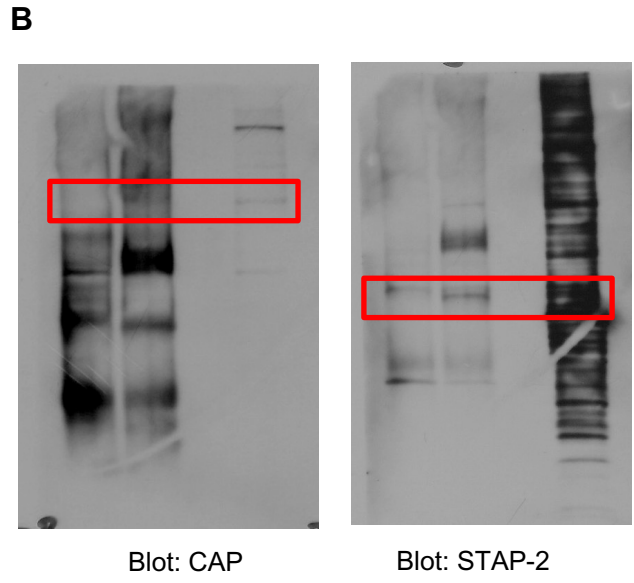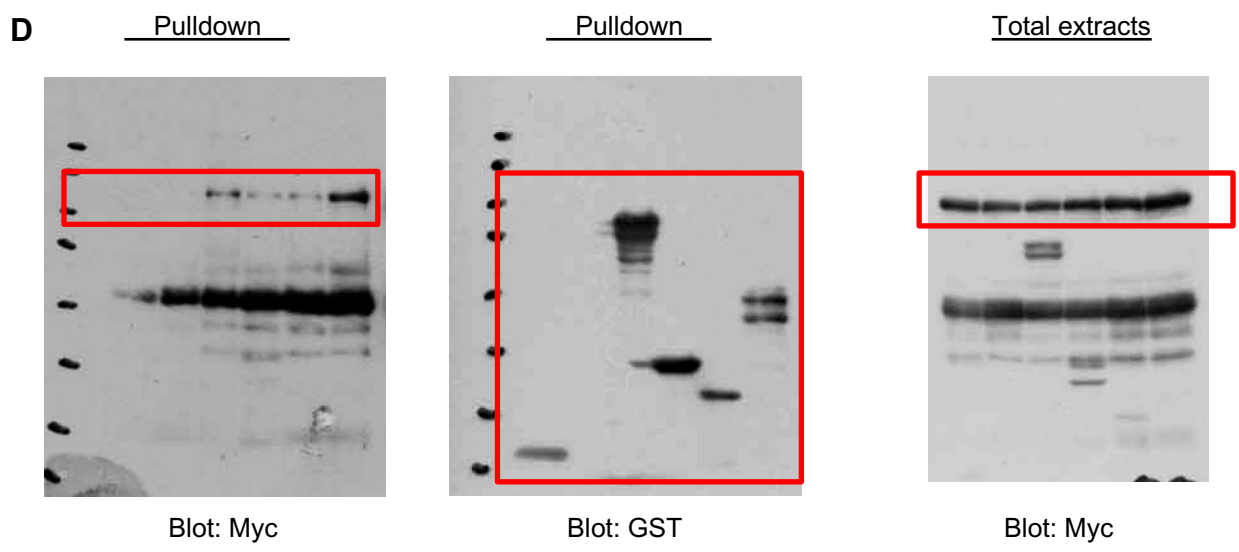

# Figure 2

A

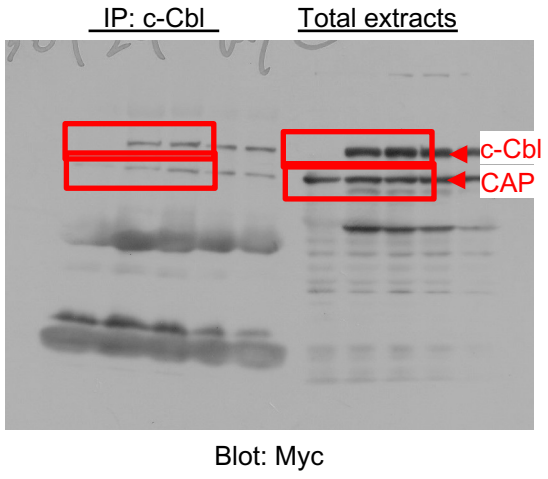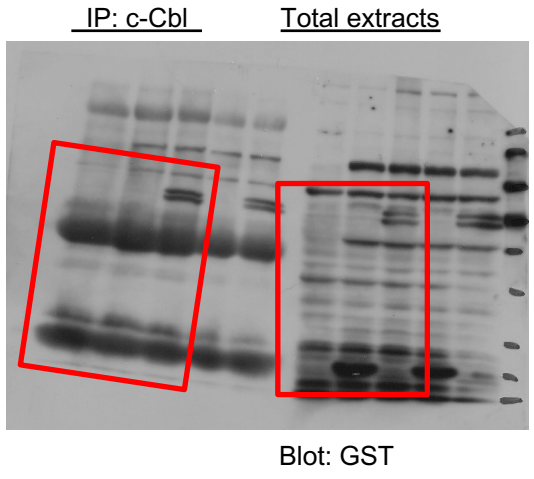

# Figure 3

B

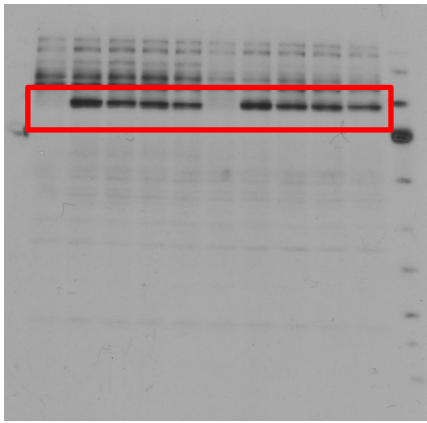

Blot: PY

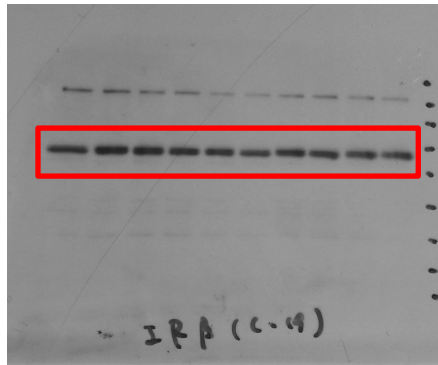

Blot: IR $\beta$

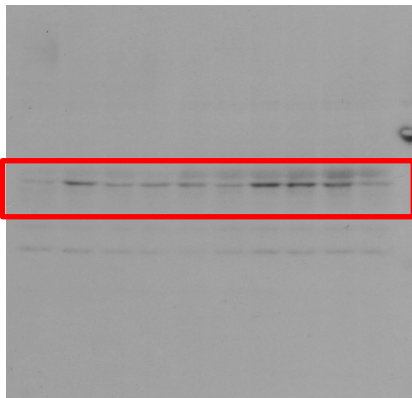

Blot: Phospho-Akt

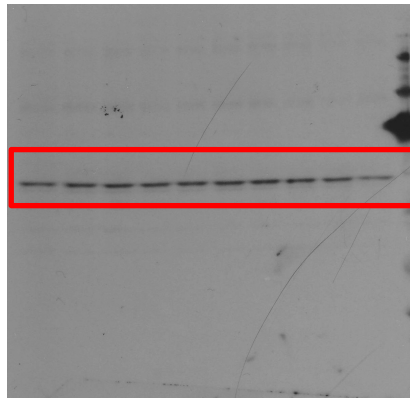

Blot: Akt

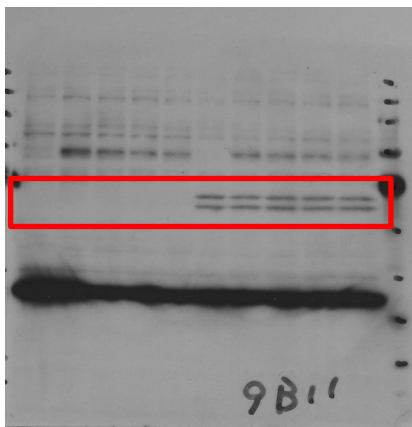

Blot: Myc

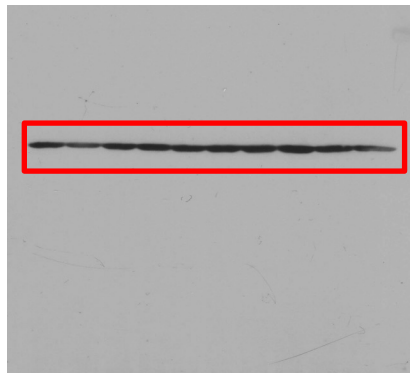

Blot: Actin

C

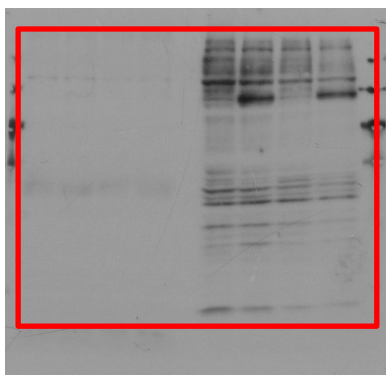

Blot: PY

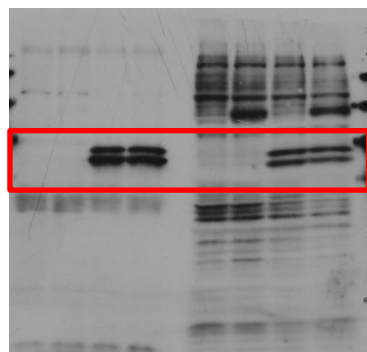

Blot: Myc

# Figure 4

D

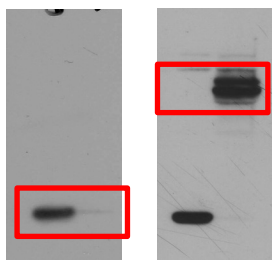

Blot: GFP

Blot: Myc
